# Supplementary material
Source: MDPI journal article supplement (https://www.mdpi.com/2311-7524/10/3/290)
Supplement: s1 [file s1]

## Supplementary Tables and Figures

**Table S1 The components and their concentrations in different nitrogen levels**

| No. | Chemical compound                                    | Mother liquor |        | NN | NF | NR  | LN  |
|-----|------------------------------------------------------|---------------|--------|----|----|-----|-----|
|     |                                                      | mmol/L        | g/L    |    |    |     |     |
| 1   | KNO <sub>3</sub>                                     | 1000          | 101.1  | 6  | -  | 4.2 | 1.2 |
| 2   | Ca(NO <sub>3</sub> ) <sub>2</sub> ·4H <sub>2</sub> O | 1000          | 236.16 | 4  | -  | 2.8 | 0.8 |
| 3   | NH <sub>4</sub> H <sub>2</sub> PO <sub>4</sub>       | 1000          | 115.08 | 2  | -  | 1.4 | 0.4 |
| 4   | MgSO <sub>4</sub> ·7H <sub>2</sub> O                 | 1000          | 246.49 | 1  | 1  | 1   | 1   |
| 5   | K <sub>2</sub> HPO <sub>4</sub> ·3H <sub>2</sub> O   | 1000          | 228.22 | -  | 2  | 0.6 | 1.6 |
| 6   | CaCl <sub>2</sub>                                    | 1000          | 110.99 | -  | 4  | 1.2 | 3.2 |
| 7   | K <sub>2</sub> SO <sub>4</sub>                       | 1000          | 174.25 | -  | 2  | 0.6 | 1.6 |
| 8   | KCl                                                  | 1000          | 74.5   | 4  | 4  | 4   | 4   |
| 9   | H <sub>3</sub> BO <sub>3</sub>                       | 12.5          | 0.773  | 2  | 2  | 2   | 2   |
| 10  | MnSO <sub>4</sub> ·H <sub>2</sub> O                  | 1             | 0.169  | 2  | 2  | 2   | 2   |
| 11  | ZnSO <sub>4</sub> ·7H <sub>2</sub> O                 | 1             | 0.288  | 2  | 2  | 2   | 2   |
| 12  | CuSO <sub>4</sub> ·5H <sub>2</sub> O                 | 0.25          | 0.062  | 2  | 2  | 2   | 2   |
| 13  | H <sub>2</sub> MoO <sub>4</sub>                      | 0.25          | 0.04   | 2  | 2  | 2   | 2   |
| 14  | EDTA-Fe                                              | 0.25          | 30     | 1  | 1  | 1   | 1   |

**Table S2 The primers of candidate and reference genes for qRT-PCR analysis**

| NO. | Gene name | Forward primer        | Reverse primer            |
|-----|-----------|-----------------------|---------------------------|
| 1   | Actin     | CTTAGCACTTTCCAGCAGATG | ACACCAAAAACTACCCCGAC      |
| 2   | AMT3.1    | AAGTGGGCGGTGAACCTCG   | GCAGCAGCTTGTCTCCGA        |
| 3   | IPD3      | GGAGATGGAGGGGAGGGG    | GGTCGGTGCAGAACTCCC        |
| 4   | NRT2.3a   | GCAGAAGGCCACGGAGTT    | CGGAGCTGCAAAGGTGGA        |
| 5   | NRT       | ACAAGACTTGCCGGACGG    | CGTCGGCGATGACTACCC        |
| 6   | OPT       | GGTGTTCGGAACTGGGG     | ATGGACACCCCGCAGTTG        |
| 7   | VIT       | GGATCAGGATCGCGGTGG    | GCCATCCACCCTCCAACC        |
| 8   | D27       | GGCACCGAGGGACAAGAC    | TGCTGCCGCAACTAAGCT        |
| 9   | GRAM      | TCGTGCCAGGCGAAAAGT    | ATCGATCGCTGCGGAAGG        |
| 10  | C7A10.890 | GAAGCTCAAAGGAGGCATTG  | GCCAGTGCAAGCTATGACAA      |
| 11  | AFP3a     | AGGAAAGGATAGGCTACCGA  | CCTGGAAGTCAGGCACACAGGACAG |
| 12  | AGAL2     | GGAAGGTGGCTGTGGTCC    | GACGAGAGGCCGATGTCTG       |
| 13  | GRAM      | TCGTGCCAGGCGAAAAGT    | GGATCGATCGCTGCGGAA        |
| 14  | LBD37a    | GGCACACGCTACCGTCTT    | CGCCTCAAACAGCAGGGA        |
| 15  | XTH7      | GGTCTGAACCGTGTATGGCT  | GGTCCTCATCGATCCTGAAA      |
| 16  | ERF5a     | AGTACGCAGGAGGAGGCA    | AGGCTTCTGCGGGCATT         |
| 17  | PHL6      | GAGCACTGCAATTGCGCA    | ACGCAATTCCAGTGGGGG        |
| 18  | SNP2      | GTGTGGAAGCCGCCTCTT    | CCTCAAAGCTGGCCGTGA        |
| 19  | WRKY43    | GCGTCCCCAACCTCTTCC    | GCTGCATCAGAGCAACGC        |

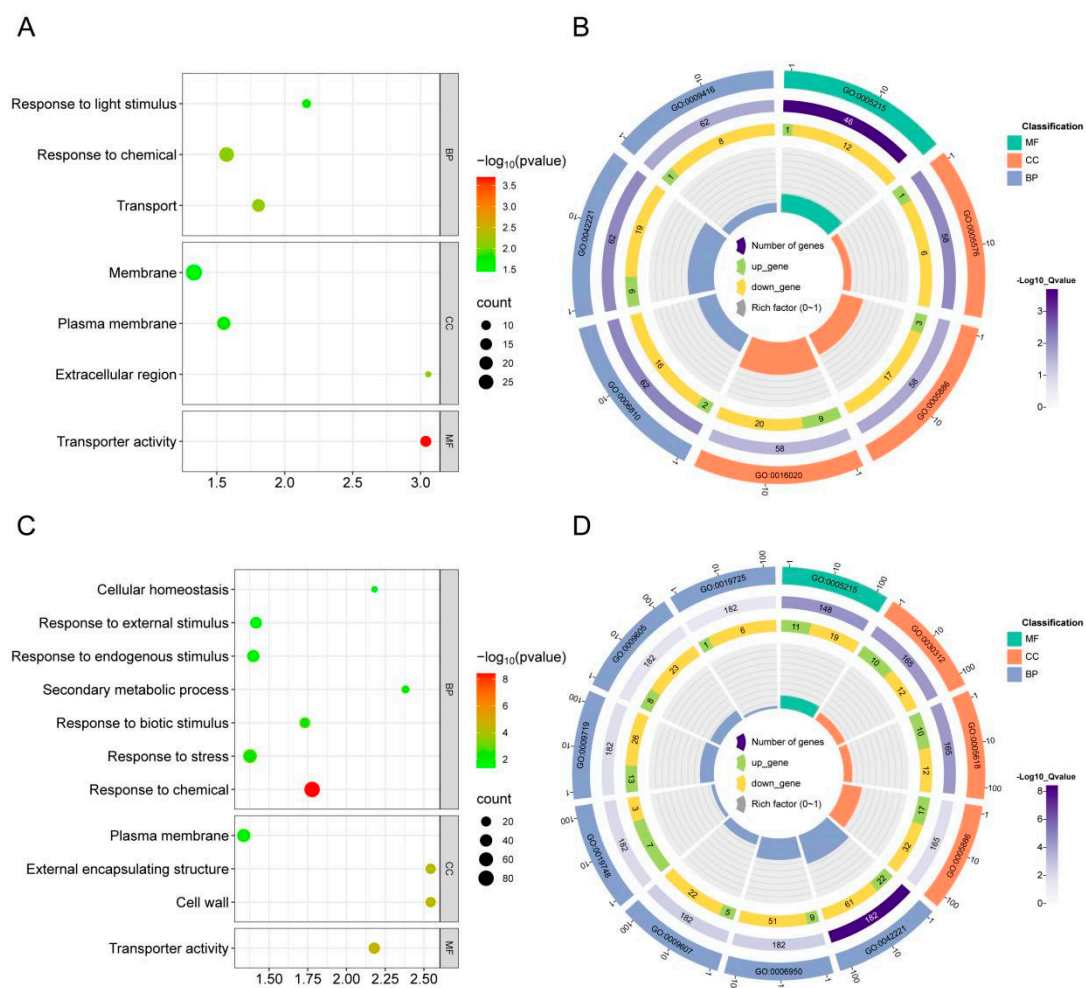

**Figure S1.** GO enrichment analysis of differentially expressed genes was obtained (A-B) NN vs LN; (C-D) NN vs NF.

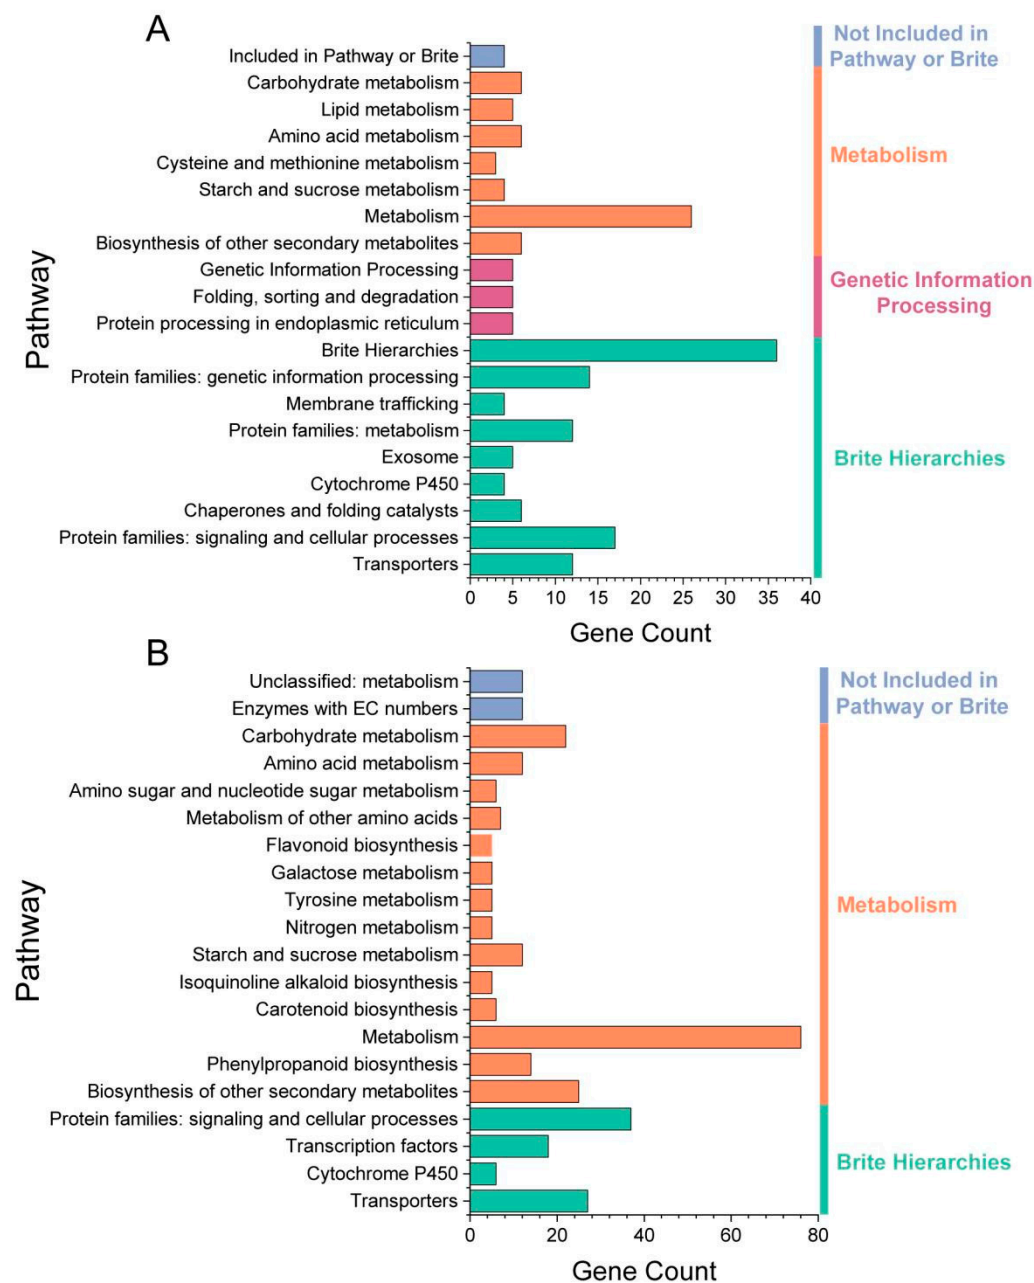

**Figure S2.** KEGG enrichment analysis of differentially expressed genes was obtained (A) NN vs LN; (B) NN vs NF.
